# Supplementary material
Source: ML conference proceedings conference paper supplement (https://proceedings.mlr.press/v139/azulay21a.html)
Supplement: Supplementary file [file azulay21a-supp.pdf]

# Appendices

## A. Proof of Lemma 3.1

We have  $Q(\tilde{\mathbf{w}}(t))$  such that for all  $t$ ,  $\nabla Q(\tilde{\mathbf{w}}(t)) = \mathbf{X}\boldsymbol{\nu}(t)$ . Thus we get that for every finite time  $t$ ,  $\tilde{\mathbf{w}}(t)$  is the solution of the minimization problem  $\tilde{\mathbf{w}}(t) = \arg \min_{\mathbf{w}} Q(\mathbf{w}) \quad \text{s.t.} \quad \mathbf{X}^\top \mathbf{w} = \mathbf{X}^\top \tilde{\mathbf{w}}(t)$ . Since the square loss  $\|\mathbf{X}^\top \tilde{\mathbf{w}}(t) - \mathbf{y}\|^2$  is minimized by gradient flow and therefore bounded for all time  $t$ , we get that the predictions are also bounded, i.e.  $\forall t : \|\mathbf{X}^\top \tilde{\mathbf{w}}(t)\| < C$  for some finite  $C$ . Therefore, the solution  $\mathbf{w}$  to the minimization problem above is of bounded constraints and is therefore also of bounded norm, i.e.  $\|\tilde{\mathbf{w}}(t)\| < C'$  for some finite  $C'$  for all  $t$ . Taking the limit  $t \rightarrow \infty$  we therefore converge to a finite weight vector  $\tilde{\mathbf{w}}(\infty)$ .

Next, from the relation  $\nabla Q(\tilde{\mathbf{w}}(t)) = \mathbf{X}\boldsymbol{\nu}(t)$  we get that if the RHS is infinite at  $t \rightarrow \infty$  then  $\nabla Q(\tilde{\mathbf{w}}(\infty))$  is infinite. However, since we converge to a finite weight vector  $\tilde{\mathbf{w}}(\infty)$ , we get a contradiction since  $\nabla Q(\tilde{\mathbf{w}})$  is bounded for any finite input. Therefore,  $\lim_{t \rightarrow \infty} \mathbf{X}\boldsymbol{\nu}(t)$  is finite.

Next, we decompose  $\mathbf{X}$  to its singular value decomposition

$$\mathbf{X} = \sum_{j:s_j>0} s_j \mathbf{v}_j \mathbf{u}_j^\top$$

where  $s_i$  are the singular values, and  $\{\mathbf{v}_i\}$  and  $\{\mathbf{u}_i\}$  are two sets of orthogonal vectors. We define

$$\boldsymbol{\nu} \triangleq \lim_{t \rightarrow \infty} \sum_{i:s_i>0} \mathbf{u}_i \mathbf{u}_i^\top \boldsymbol{\nu}(t)$$

and note that

$$\begin{aligned} \mathbf{X}\boldsymbol{\nu} &= \lim_{t \rightarrow \infty} \sum_{j:s_j>0} s_j \mathbf{v}_j \mathbf{u}_j^\top \sum_{i:s_i>0} \mathbf{u}_i \mathbf{u}_i^\top \boldsymbol{\nu}(t) \\ &= \lim_{t \rightarrow \infty} \sum_{j:s_j>0} \sum_{i:s_i>0} s_j \mathbf{v}_i \mathbf{u}_j^\top \mathbf{u}_i \mathbf{u}_i^\top \boldsymbol{\nu}(t) \\ &\stackrel{(1)}{=} \lim_{t \rightarrow \infty} \sum_{j:s_j>0} s_i \mathbf{v}_i \mathbf{u}_i^\top \boldsymbol{\nu}(t) \\ &= \lim_{t \rightarrow \infty} \mathbf{X}\boldsymbol{\nu}(t) = \nabla Q(\tilde{\mathbf{w}}(\infty)) \end{aligned}$$

where in (1) we used the fact that  $\mathbf{u}_j^\top \mathbf{u}_i = \delta_{i,j}$ . Therefore,  $\boldsymbol{\nu}$  respects the KKT stationary condition

$$\mathbf{X}\boldsymbol{\nu} = \nabla Q(\tilde{\mathbf{w}}(\infty)).$$

Lastly, we show that  $\boldsymbol{\nu}$  is finite. Recall that

$$\nabla Q(\tilde{\mathbf{w}}(\infty)) = \lim_{t \rightarrow \infty} \sum_{j:s_j>0} s_j \mathbf{v}_j \mathbf{u}_j^\top \boldsymbol{\nu}(t)$$

For any  $i$  such that  $s_i > 0$ , if we multiply this equation by  $\mathbf{v}_i^\top$  from the left, recalling  $\mathbf{v}_i^\top \mathbf{v}_i = \delta_{i,i}$ , we obtain

$$\infty > s_i^{-1} \mathbf{v}_i^\top \nabla Q(\tilde{\mathbf{w}}(\infty)) = \lim_{t \rightarrow \infty} \mathbf{u}_i^\top \boldsymbol{\nu}(t)$$

Therefore,

$$\|\boldsymbol{\nu}\| = \left\| \lim_{t \rightarrow \infty} \sum_{i:s_i>0} \mathbf{u}_i \mathbf{u}_i^\top \boldsymbol{\nu}(t) \right\| < \infty.$$

## B. Proof of Theorem 4.1

*Proof.* We examine a two-layer “diagonal linear network” with untied weights

$$f(\mathbf{x}; \mathbf{u}_+, \mathbf{u}_-, \mathbf{v}_+, \mathbf{v}_-) = (\mathbf{u}_+ \circ \mathbf{v}_+ - \mathbf{u}_- \circ \mathbf{v}_-)^{\top} \mathbf{x} = \tilde{\mathbf{w}}^{\top} \mathbf{x},$$

where

$$\tilde{\mathbf{w}} = \mathbf{u}_+ \circ \mathbf{v}_+ - \mathbf{u}_- \circ \mathbf{v}_-. \quad (17)$$

The gradient flow dynamics of the parameters is given by:

$$\begin{aligned} \frac{du_{+,i}}{dt} &= -\frac{\partial \mathcal{L}}{\partial u_{+,i}} = v_{+,i}(t) \left( \sum_{n=1}^N x_i^{(n)} r^{(n)}(t) \right) \\ \frac{du_{-,i}}{dt} &= -\frac{\partial \mathcal{L}}{\partial u_{-,i}} = -v_{-,i}(t) \left( \sum_{n=1}^N x_i^{(n)} r^{(n)}(t) \right) \\ \frac{dv_{+,i}}{dt} &= -\frac{\partial \mathcal{L}}{\partial v_{+,i}} = u_{+,i}(t) \left( \sum_{n=1}^N x_i^{(n)} r^{(n)}(t) \right) \\ \frac{dv_{-,i}}{dt} &= -\frac{\partial \mathcal{L}}{\partial v_{-,i}} = -u_{-,i}(t) \left( \sum_{n=1}^N x_i^{(n)} r^{(n)}(t) \right) \end{aligned}$$

where we denote the residual

$$r^{(n)}(t) \triangleq y^{(n)} - \tilde{\mathbf{w}}^{\top}(t) \mathbf{x}^{(n)}.$$

From Eq. 17 we can write:

$$\begin{aligned} \frac{d\tilde{w}_i}{dt} &= \frac{du_{+,i}}{dt} v_{+,i} + u_{+,i} \frac{dv_{+,i}}{dt} - \frac{du_{-,i}}{dt} v_{-,i} - u_{-,i} \frac{dv_{-,i}}{dt} \\ &= v_{+,i}^2 \sum_{n=1}^N x_i^{(n)} r^{(n)} + u_{+,i}^2 \sum_{n=1}^N x_i^{(n)} r^{(n)} + v_{-,i}^2 \sum_{n=1}^N x_i^{(n)} r^{(n)} + u_{-,i}^2 \sum_{n=1}^N x_i^{(n)} r^{(n)} \\ &= (u_{+,i}^2 + v_{+,i}^2 + u_{-,i}^2 + v_{-,i}^2) \sum_{n=1}^N x_i^{(n)} r^{(n)}. \end{aligned}$$

Thus,

$$\frac{1}{u_{+,i}^2 + v_{+,i}^2 + u_{-,i}^2 + v_{-,i}^2} \frac{d\tilde{w}_i}{dt} = \sum_{n=1}^N x_i^{(n)} r^{(n)}.$$

We note that the quantity  $u_{+,i}u_{-,i} + v_{+,i}v_{-,i}$  is conserved during training, since

$$\begin{aligned} \frac{d}{dt} (u_{+,i}u_{-,i} + v_{+,i}v_{-,i}) &= \frac{du_{+,i}}{dt} u_{-,i} + u_{+,i} \frac{du_{-,i}}{dt} + \frac{dv_{+,i}}{dt} v_{-,i} + v_{+,i} \frac{dv_{-,i}}{dt} \\ &= u_{-,i} v_{+,i} \sum_{n=1}^N x_i^{(n)} r^{(n)} - u_{+,i} v_{-,i} \sum_{n=1}^N x_i^{(n)} r^{(n)} + u_{+,i} v_{-,i} \sum_{n=1}^N x_i^{(n)} r^{(n)} - v_{+,i} u_{-,i} \sum_{n=1}^N x_i^{(n)} r^{(n)} \\ &= 0. \end{aligned}$$

So

$$u_{+,i}u_{-,i} + v_{+,i}v_{-,i} = u_{+,i}(0)u_{-,i}(0) + v_{+,i}(0)v_{-,i}(0) \triangleq c_i. \quad (18)$$

Combining Eq. 17 and Eq. 18 we can write:

$$\begin{cases} \tilde{w}_i = u_{+,i}v_{+,i} - u_{-,i}v_{-,i} \\ u_{+,i}u_{-,i} + v_{+,i}v_{-,i} = c_i \end{cases} \Rightarrow \begin{cases} \tilde{w}_i^2 = u_{+,i}^2 v_{+,i}^2 + u_{-,i}^2 v_{-,i}^2 - 2u_{+,i}v_{+,i}u_{-,i}v_{-,i} \\ u_{+,i}^2 u_{-,i}^2 + v_{+,i}^2 v_{-,i}^2 + 2u_{+,i}u_{-,i}v_{+,i}v_{-,i} = c_i^2 \end{cases}$$

$$\Rightarrow u_{+,i}^2 u_{-,i}^2 + v_{+,i}^2 v_{-,i}^2 + u_{+,i}^2 v_{+,i}^2 + u_{-,i}^2 v_{-,i}^2 - \tilde{w}_i^2 = c_i^2. \quad (19)$$

We also know that:

$$v_{+,i}^2 - u_{+,i}^2 = v_{+,i}^2(0) - u_{+,i}^2(0) \triangleq \delta_{+,i}$$

$$v_{-,i}^2 - u_{-,i}^2 = v_{-,i}^2(0) - u_{-,i}^2(0) \triangleq \delta_{-,i}$$

which can be easily shown since  $\frac{d}{dt}(v_{+,i}^2 - u_{+,i}^2) = 0$  and  $\frac{d}{dt}(v_{-,i}^2 - u_{-,i}^2) = 0$ . So using Eq. 19 we can write:

$$\begin{aligned} & u_{+,i}^2 u_{-,i}^2 + (\delta_{+,i} + u_{+,i}^2)(\delta_{-,i} + u_{-,i}^2) + u_{+,i}^2(\delta_{+,i} + u_{+,i}^2) + u_{-,i}^2(\delta_{-,i} + u_{-,i}^2) - \tilde{w}_i^2 = c_i^2 \\ & \Rightarrow (u_{+,i}^2 + u_{-,i}^2)^2 + (\delta_{+,i} + \delta_{-,i})(u_{+,i}^2 + u_{-,i}^2) + \delta_{+,i}\delta_{-,i} - \tilde{w}_i^2 - c_i^2 = 0 \\ & \Rightarrow u_{+,i}^2 + u_{-,i}^2 = \frac{-(\delta_{+,i} + \delta_{-,i}) + \sqrt{(\delta_{+,i} + \delta_{-,i})^2 - 4(\delta_{+,i}\delta_{-,i} - \tilde{w}_i^2 - c_i^2)}}{2} \\ & = \frac{-(\delta_{+,i} + \delta_{-,i}) + \sqrt{(\delta_{+,i} - \delta_{-,i})^2 + 4c_i^2 + 4\tilde{w}_i^2}}{2}. \end{aligned} \quad (20)$$

Coming back to  $u_{+,i}^2 + v_{+,i}^2 + u_{-,i}^2 + v_{-,i}^2$  we have using Eq. 20 that:

$$\begin{aligned} u_{+,i}^2 + v_{+,i}^2 + u_{-,i}^2 + v_{-,i}^2 &= 2(u_{+,i}^2 + u_{-,i}^2) + \delta_{+,i} + \delta_{-,i} \\ &= \sqrt{(\delta_{+,i} - \delta_{-,i})^2 + 4c_i^2 + 4\tilde{w}_i^2}. \end{aligned}$$

Therefore,

$$\frac{1}{\sqrt{(\delta_{+,i} - \delta_{-,i})^2 + 4c_i^2 + 4\tilde{w}_i^2}} \frac{d\tilde{w}_i}{dt} = \sum_{n=1}^N x_i^{(n)} r^{(n)}.$$

We follow the IMD approach for deriving the implicit bias (presented in detail in Section 3 of the main paper) and try and find a function  $q(\tilde{w}_i)$  such that:

$$\nabla^2 q(\tilde{w}_i(t)) = \frac{1}{\sqrt{(\delta_{+,i} - \delta_{-,i})^2 + 4c_i^2 + 4\tilde{w}_i^2}}, \quad (21)$$

which will then give us that

$$\nabla^2 q(\tilde{w}_i(t)) \frac{d}{dt} \tilde{w}_i(t) = \sum_{n=1}^N x_i^{(n)} r^{(n)}$$

or

$$\frac{d}{dt} (\nabla q(\tilde{w}_i(t))) = \sum_{n=1}^N x_i^{(n)} r^{(n)}.$$

Integrating the above, we get

$$\nabla q(\tilde{w}_i(t)) - \nabla q(\tilde{w}_i(0)) = \sum_{n=1}^N x_i^{(n)} \int_0^t r^{(n)}(t') dt'.$$

Denoting  $\nu^{(n)} = \int_0^\infty r^{(n)}(t') dt'$ , and assuming  $q$  also satisfies  $\nabla q(\tilde{w}_i(0)) = 0$ , will in turn give us the KKT stationarity condition

$$\nabla q(\tilde{w}_i(\infty)) = \sum_{n=1}^N x_i^{(n)} \nu^{(n)}.$$

Namely, if we find a  $q$  that satisfies the conditions above we will have that gradient flow (for each weight  $\tilde{w}_i$ ) satisfies the KKT conditions for minimizing this  $q$ .

We next turn to solving for this  $q$ , beginning with Eq. 21:

$$q''(\tilde{w}_i) = \frac{1}{\sqrt{(\delta_{+,i} - \delta_{-,i})^2 + 4c_i^2 + 4\tilde{w}_i^2}} = \frac{1}{\sqrt{k_i + 4\tilde{w}_i^2}},$$

where  $k_i \triangleq (\delta_{+,i} - \delta_{-,i})^2 + 4c_i^2$ .

Integrating the above, and using the constraint  $q'(0) = 0$  we get:

$$q'(\tilde{w}_i) = \frac{\log\left(\sqrt{4\tilde{w}_i^2 + k_i} + 2\tilde{w}_i\right) - \log\left(\sqrt{k_i}\right)}{2}.$$

Simplifying the above we obtain:

$$q'(\tilde{w}_i) = \frac{1}{2} \log\left(\frac{\sqrt{4\tilde{w}_i^2 + k_i} + 2\tilde{w}_i}{\sqrt{k_i}}\right) = \frac{1}{2} \log\left(\sqrt{1 + \frac{4\tilde{w}_i^2}{k_i}} + \frac{2\tilde{w}_i}{\sqrt{k_i}}\right) = \frac{1}{2} \operatorname{arcsinh}\left(\frac{2\tilde{w}_i}{\sqrt{k_i}}\right).$$

Finally, we integrate again to obtain the desired  $q$ :

$$q_{k_i}(\tilde{w}_i) = \frac{1}{2} \int_0^{\tilde{w}_i} \operatorname{arcsinh}\left(\frac{2z}{\sqrt{k_i}}\right) dz = \frac{\sqrt{k_i}}{4} \left[ 1 - \sqrt{1 + \frac{4\tilde{w}_i^2}{k_i}} + \frac{2\tilde{w}_i}{\sqrt{k_i}} \operatorname{arcsinh}\left(\frac{2\tilde{w}_i}{\sqrt{k_i}}\right) \right],$$

where

$$k_i = (\delta_{+,i} - \delta_{-,i})^2 + 4c_i^2 = (v_{+,i}^2(0) - u_{+,i}^2(0) - v_{-,i}^2(0) + u_{-,i}^2(0))^2 + 4(u_{+,i}(0)u_{-,i}(0) + v_{+,i}(0)v_{-,i}(0))^2.$$

For the case  $u_{+,i}(0) = u_{-,i}(0)$ ,  $v_{+,i}(0) = v_{-,i}(0)$  (unbiased initialization of  $\tilde{w}_i(0) = 0$ ) we get

$$\begin{aligned} k_i &= 4(u_{+,i}^2(0) + v_{+,i}^2(0))^2 \\ \Rightarrow \sqrt{k_i} &= 2(u_{+,i}^2(0) + v_{+,i}^2(0)) = \frac{4\alpha_i(1 + s_i^2)}{1 - s_i^2}. \end{aligned}$$

Next, if we denote  $Q_{\mathbf{k}}(\tilde{\mathbf{w}}) = \sum_{i=1}^d q_{k_i}(\tilde{w}_i)$ , we can write

$$\nabla Q_{\mathbf{k}}(\tilde{\mathbf{w}}(\infty)) = (\nabla q(\tilde{w}_1(\infty)), \dots, \nabla q(\tilde{w}_d(\infty)))^\top = \sum_{n=1}^N \mathbf{x}^{(n)} \nu^{(n)}.$$

We note that  $\|\nabla Q_{\mathbf{k}}(\tilde{\mathbf{w}})\| < \infty$  when  $\|\tilde{\mathbf{w}}\| < \infty$ , and thus by using Lemma 3.1 we get that  $\nu^{(n)} < \infty$  for all  $n$ . Therefore, we get that gradient flow satisfies the KKT conditions for minimizing this  $Q$ , which completes the proof.  $\square$

### C. Proof of Theorem 6.1

*Proof.* We start by examining a general multi-neuron fully connected linear network of depth 2, reducing our claim at the end to the case of a network with a single hidden neuron ( $m = 1$ ).

The fully connected linear network of depth 2 is defined as

$$f(\mathbf{x}; \{a_i\}, \{\mathbf{w}_i\}) = \sum_{i=1}^m a_i \mathbf{w}_i^\top \mathbf{x} = \tilde{\mathbf{w}}^\top \mathbf{x},$$

where  $\tilde{\mathbf{w}} \triangleq \sum_{i=1}^m \tilde{\mathbf{w}}_i$ , and  $\tilde{\mathbf{w}}_i \triangleq a_i \mathbf{w}_i$ .

The parameter gradient flow dynamics are given by:

$$\begin{aligned}\dot{a}_i &= -\partial_{a_i} \mathcal{L} = \mathbf{w}_i^\top \left( \sum_{n=1}^N \mathbf{x}^{(n)} r^{(n)} \right) \\ \dot{\mathbf{w}}_i &= -\partial_{\mathbf{w}_i} \mathcal{L} = a_i \left( \sum_{n=1}^N \mathbf{x}^{(n)} r^{(n)} \right) \\ \frac{d}{dt} \tilde{\mathbf{w}}_i &= \dot{a}_i \mathbf{w}_i + a_i \dot{\mathbf{w}}_i = (a_i^2 \mathbf{I} + \mathbf{w}_i \mathbf{w}_i^\top) \left( \sum_{n=1}^N \mathbf{x}^{(n)} r^{(n)} \right),\end{aligned}$$

where we denote the residual

$$r^{(n)}(t) \triangleq y^{(n)} - \tilde{\mathbf{w}}^\top(t) \mathbf{x}^{(n)}.$$

Using Theorem 2.1 of [Du et al. \(2018\)](#) (stated in Section 6), we can write

$$\frac{d}{dt} \tilde{\mathbf{w}}_i(t) = \left( (\delta_i + \|\mathbf{w}_i(t)\|^2) \mathbf{I} + \mathbf{w}_i(t) \mathbf{w}_i^\top(t) \right) \left( \sum_{n=1}^N \mathbf{x}^{(n)} r^{(n)} \right), \quad (22)$$

or also

$$\left( (\delta_i + \|\mathbf{w}_i(t)\|^2) \mathbf{I} + \mathbf{w}_i(t) \mathbf{w}_i^\top(t) \right)^{-1} \frac{d}{dt} \tilde{\mathbf{w}}_i(t) = \left( \sum_{n=1}^N \mathbf{x}^{(n)} r^{(n)} \right)$$

where assuming  $\delta_i \geq 0$ , a non-zero initialization  $\tilde{\mathbf{w}}(0) = a(0) \mathbf{w}(0) \neq \mathbf{0}$  and that we converge to zero-loss solution, gives us that the expression  $\left( (\delta_i + \|\mathbf{w}_i(t)\|^2) \mathbf{I} + \mathbf{w}_i(t) \mathbf{w}_i^\top(t) \right)^{-1}$  exists.

Using the Sherman-Morrisson Lemma, we have

$$\left( \delta_i + \|\mathbf{w}_i(t)\|^2 \right)^{-1} \left( \mathbf{I} - \frac{\mathbf{w}_i(t) \mathbf{w}_i^\top(t)}{\left( \delta_i + 2 \|\mathbf{w}_i(t)\|^2 \right)} \right) \frac{d}{dt} \tilde{\mathbf{w}}_i = \left( \sum_{n=1}^N \mathbf{x}^{(n)} r^{(n)} \right),$$

or

$$\left( \delta_i + \|\mathbf{w}_i(t)\|^2 \right)^{-1} \left( \mathbf{I} - \frac{\tilde{\mathbf{w}}_i(t) \tilde{\mathbf{w}}_i^\top(t)}{\left( \delta_i + \|\mathbf{w}_i(t)\|^2 \right) \left( \delta_i + 2 \|\mathbf{w}_i(t)\|^2 \right)} \right) \frac{d}{dt} \tilde{\mathbf{w}}_i = \left( \sum_{n=1}^N \mathbf{x}^{(n)} r^{(n)} \right) \quad (23)$$

where we again employed Theorem 2.1 of [Du et al. \(2018\)](#).

Also, since

$$\|\tilde{\mathbf{w}}_i(t)\|^2 = a_i^2(t) \|\mathbf{w}_i(t)\|^2 = \|\mathbf{w}_i(t)\|^2 \left( \delta_i + \|\mathbf{w}_i(t)\|^2 \right),$$

we can express  $\mathbf{w}$  as a function of  $\tilde{\mathbf{w}}$ :

$$\|\mathbf{w}_i(t)\|^2 = \frac{-\delta_i}{2} \pm \sqrt{\frac{\delta_i^2}{4} + \|\tilde{\mathbf{w}}_i(t)\|^2}.$$

Since  $\|\mathbf{w}_i(t)\|^2 \geq 0$  we choose the (+) sign and obtain

$$\|\mathbf{w}_i(t)\| = \sqrt{\frac{-\delta_i}{2} + \sqrt{\frac{\delta_i^2}{4} + \|\tilde{\mathbf{w}}_i(t)\|^2}}.$$

Therefore, we can write Eq. 23 as:

$$\left( \frac{\delta_i}{2} + \sqrt{\frac{\delta_i^2}{4} + \|\tilde{\mathbf{w}}_i(t)\|^2} \right)^{-1} \left( \mathbf{I} - \frac{\tilde{\mathbf{w}}_i(t)\tilde{\mathbf{w}}_i^\top(t)}{2 \left( \frac{\delta_i}{2} + \sqrt{\frac{\delta_i^2}{4} + \|\tilde{\mathbf{w}}_i(t)\|^2} \right) \sqrt{\frac{\delta_i^2}{4} + \|\tilde{\mathbf{w}}_i(t)\|^2}} \right) \frac{d}{dt} \tilde{\mathbf{w}}_i(t) = \sum_{n=1}^N \mathbf{x}^{(n)} r^{(n)}(t). \quad (24)$$

We follow the "warped IMD" technique for deriving the implicit bias (presented in detail in Section 5 of the main text) and multiply Eq. 24 by some function  $g(\tilde{\mathbf{w}}_i(t))$

$$\begin{aligned} g(\tilde{\mathbf{w}}_i(t)) \left( \frac{\delta_i}{2} + \sqrt{\frac{\delta_i^2}{4} + \|\tilde{\mathbf{w}}_i(t)\|^2} \right)^{-1} \left( \mathbf{I} - \frac{\tilde{\mathbf{w}}_i(t)\tilde{\mathbf{w}}_i^\top(t)}{2 \left( \frac{\delta_i}{2} + \sqrt{\frac{\delta_i^2}{4} + \|\tilde{\mathbf{w}}_i(t)\|^2} \right) \sqrt{\frac{\delta_i^2}{4} + \|\tilde{\mathbf{w}}_i(t)\|^2}} \right) \frac{d}{dt} \tilde{\mathbf{w}}_i(t) \\ = \sum_{n=1}^N \mathbf{x}^{(n)} g(\tilde{\mathbf{w}}_i(t)) r^{(n)}(t). \end{aligned}$$

Following the approach in Section 5, we then try and find  $q(\tilde{\mathbf{w}}_i(t)) = \hat{q}(\|\tilde{\mathbf{w}}_i(t)\|) + \mathbf{z}^\top \tilde{\mathbf{w}}_i(t)$  and  $g(\tilde{\mathbf{w}}_i(t))$  such that

$$\nabla^2 q(\tilde{\mathbf{w}}_i(t)) = g(\tilde{\mathbf{w}}_i(t)) \left( \frac{\delta_i}{2} + \sqrt{\frac{\delta_i^2}{4} + \|\tilde{\mathbf{w}}_i(t)\|^2} \right)^{-1} \left( \mathbf{I} - \frac{\tilde{\mathbf{w}}_i(t)\tilde{\mathbf{w}}_i^\top(t)}{2 \left( \frac{\delta_i}{2} + \sqrt{\frac{\delta_i^2}{4} + \|\tilde{\mathbf{w}}_i(t)\|^2} \right) \sqrt{\frac{\delta_i^2}{4} + \|\tilde{\mathbf{w}}_i(t)\|^2}} \right), \quad (25)$$

so that then we'll have,

$$\begin{aligned} \nabla^2 q(\tilde{\mathbf{w}}_i(t)) \frac{d}{dt} \tilde{\mathbf{w}}_i(t) &= \sum_{n=1}^N \mathbf{x}^{(n)} g(\tilde{\mathbf{w}}_i(t)) r^{(n)}(t) \\ \frac{d}{dt} (\nabla q(\tilde{\mathbf{w}}_i(t))) &= \sum_{n=1}^N \mathbf{x}^{(n)} g(\tilde{\mathbf{w}}_i(t)) r^{(n)}(t) \\ \nabla q(\tilde{\mathbf{w}}_i(t)) - \nabla q(\tilde{\mathbf{w}}_i(0)) &= \sum_{n=1}^N \mathbf{x}^{(n)} \int_0^t g(\tilde{\mathbf{w}}_i(t')) r^{(n)}(t') dt'. \end{aligned}$$

Requiring  $\nabla q(\tilde{\mathbf{w}}_i(0)) = 0$ , and denoting  $\nu_i^{(n)} = \int_0^\infty g(\tilde{\mathbf{w}}_i(t')) r^{(n)}(t') dt'$ , we get the condition:

$$\nabla q(\tilde{\mathbf{w}}_i(\infty)) = \sum_{n=1}^N \mathbf{x}^{(n)} \nu_i^{(n)}.$$

To find  $q$  we note that:

$$\nabla q(\tilde{\mathbf{w}}_i(t)) = \hat{q}'(\|\tilde{\mathbf{w}}_i(t)\|) \frac{\tilde{\mathbf{w}}_i(t)}{\|\tilde{\mathbf{w}}_i(t)\|} + \mathbf{z}$$

and

$$\begin{aligned} \nabla^2 q(\tilde{\mathbf{w}}_i(t)) &= \left[ \hat{q}''(\|\tilde{\mathbf{w}}_i(t)\|) - \hat{q}'(\|\tilde{\mathbf{w}}_i(t)\|) \frac{1}{\|\tilde{\mathbf{w}}_i(t)\|} \right] \frac{\tilde{\mathbf{w}}_i(t)\tilde{\mathbf{w}}_i^\top(t)}{\|\tilde{\mathbf{w}}_i(t)\|^2} + \hat{q}'(\|\tilde{\mathbf{w}}_i(t)\|) \frac{1}{\|\tilde{\mathbf{w}}_i(t)\|} \mathbf{I} \\ &= \frac{\hat{q}'(\|\tilde{\mathbf{w}}_i(t)\|)}{\|\tilde{\mathbf{w}}_i(t)\|} \left[ \mathbf{I} - \left[ 1 - \|\tilde{\mathbf{w}}_i(t)\| \frac{\hat{q}''(\|\tilde{\mathbf{w}}_i(t)\|)}{\hat{q}'(\|\tilde{\mathbf{w}}_i(t)\|)} \right] \frac{\tilde{\mathbf{w}}_i(t)\tilde{\mathbf{w}}_i^\top(t)}{\|\tilde{\mathbf{w}}_i(t)\|^2} \right]. \end{aligned}$$

Comparing the form above with the Hessian in Eq. 25 we require

$$g(\tilde{\mathbf{w}}_i(t)) = \frac{\hat{q}'(\|\tilde{\mathbf{w}}_i(t)\|)}{\|\tilde{\mathbf{w}}_i(t)\|} \left( \frac{\delta_i}{2} + \sqrt{\frac{\delta_i^2}{4} + \|\tilde{\mathbf{w}}_i(t)\|^2} \right)$$

and

$$\begin{aligned}
 & \frac{1}{2 \left( \frac{\delta_i}{2} + \sqrt{\frac{\delta_i^2}{4} + \|\tilde{\mathbf{w}}_i(t)\|^2} \right) \sqrt{\frac{\delta_i^2}{4} + \|\tilde{\mathbf{w}}_i(t)\|^2}} = \frac{1 - \|\tilde{\mathbf{w}}_i(t)\| \frac{\hat{q}''(\|\tilde{\mathbf{w}}_i(t)\|)}{\hat{q}'(\|\tilde{\mathbf{w}}_i(t)\|)}}{\|\tilde{\mathbf{w}}_i(t)\|^2} \\
 & \Rightarrow \frac{\hat{q}''(\|\tilde{\mathbf{w}}_i(t)\|)}{\hat{q}'(\|\tilde{\mathbf{w}}_i(t)\|)} = \frac{1 - \frac{\|\tilde{\mathbf{w}}_i(t)\|^2}{\left( \frac{\delta_i}{2} + \sqrt{\frac{\delta_i^2}{4} + \|\tilde{\mathbf{w}}_i(t)\|^2} \right) \sqrt{\delta_i^2 + 4\|\tilde{\mathbf{w}}_i(t)\|^2}}}{\|\tilde{\mathbf{w}}_i(t)\|} \\
 & \Rightarrow \frac{\hat{q}''(x)}{\hat{q}'(x)} = \frac{1 - \frac{x^2}{\left( \frac{\delta_i}{2} + \sqrt{\frac{\delta_i^2}{4} + x^2} \right) \sqrt{\delta_i^2 + 4x^2}}}{x}.
 \end{aligned}$$

Integrating that we get

$$\begin{aligned}
 \log \hat{q}'(x) &= \frac{1}{2} \log \left( \sqrt{x^2 + \frac{\delta_i^2}{4}} - \frac{\delta_i}{2} \right) + C \\
 \Rightarrow \hat{q}'(x) &= C \sqrt{\sqrt{x^2 + \frac{\delta_i^2}{4}} - \frac{\delta_i}{2}} \\
 \Rightarrow \hat{q}(x) &= C \frac{\left( x^2 - \frac{\delta_i}{2} \left( \frac{\delta_i}{2} + \sqrt{x^2 + \frac{\delta_i^2}{4}} \right) \right) \sqrt{\sqrt{x^2 + \frac{\delta_i^2}{4}} - \frac{\delta_i}{2}}}{x} + C'.
 \end{aligned}$$

Therefore,

$$q(\tilde{\mathbf{w}}_i(t)) = C \frac{\left( \|\tilde{\mathbf{w}}_i(t)\|^2 - \frac{\delta_i}{2} \left( \frac{\delta_i}{2} + \sqrt{\|\tilde{\mathbf{w}}_i(t)\|^2 + \frac{\delta_i^2}{4}} \right) \right) \sqrt{\sqrt{\|\tilde{\mathbf{w}}_i(t)\|^2 + \frac{\delta_i^2}{4}} - \frac{\delta_i}{2}}}{\|\tilde{\mathbf{w}}_i(t)\|} + \mathbf{z}^\top \tilde{\mathbf{w}}_i(t) + C'.$$

Now, from the condition  $\nabla q(\tilde{\mathbf{w}}_i(0)) = 0$  we have

$$\begin{aligned}
 \nabla q(\tilde{\mathbf{w}}_i(0)) &= \frac{3}{2} C \frac{\tilde{\mathbf{w}}_i(0)}{\|\tilde{\mathbf{w}}_i(0)\|} \sqrt{\sqrt{\|\tilde{\mathbf{w}}_i(0)\|^2 + \frac{\delta_i^2}{4}} - \frac{\delta_i}{2}} + \mathbf{z} = 0 \\
 \Rightarrow \mathbf{z} &= -\frac{3}{2} C \frac{\tilde{\mathbf{w}}_i(0)}{\|\tilde{\mathbf{w}}_i(0)\|} \sqrt{\sqrt{\|\tilde{\mathbf{w}}_i(0)\|^2 + \frac{\delta_i^2}{4}} - \frac{\delta_i}{2}}.
 \end{aligned}$$

We can set  $C = 1$ ,  $C' = 0$  and get

$$\begin{aligned}
 q(\tilde{\mathbf{w}}_i(t)) &= \frac{\left( \|\tilde{\mathbf{w}}_i(t)\|^2 - \frac{\delta_i}{2} \left( \frac{\delta_i}{2} + \sqrt{\|\tilde{\mathbf{w}}_i(t)\|^2 + \frac{\delta_i^2}{4}} \right) \right) \sqrt{\sqrt{\|\tilde{\mathbf{w}}_i(t)\|^2 + \frac{\delta_i^2}{4}} - \frac{\delta_i}{2}}}{\|\tilde{\mathbf{w}}_i(t)\|} \\
 &\quad - \frac{3}{2} \sqrt{\sqrt{\|\tilde{\mathbf{w}}_i(0)\|^2 + \frac{\delta_i^2}{4}} - \frac{\delta_i}{2}} \frac{\tilde{\mathbf{w}}_i^\top(0)}{\|\tilde{\mathbf{w}}_i(0)\|} \tilde{\mathbf{w}}_i(t).
 \end{aligned}$$

Finally, for the case of a fully connected network with a single hidden neuron ( $m = 1$ ), the condition

$$\nabla q(\tilde{\mathbf{w}}_i(\infty)) = \sum_{n=1}^N \mathbf{x}^{(n)} \nu_i^{(n)}$$

can be written as

$$\nabla q(\tilde{\mathbf{w}}(\infty)) = \sum_{n=1}^N \mathbf{x}^{(n)} \nu^{(n)}$$

in which  $\nu^{(n)}$  has no dependency on the index  $i$ . Moreover, we note that  $\|\nabla q(\tilde{\mathbf{w}})\| < \infty$  when  $\|\tilde{\mathbf{w}}\| < \infty$ , and thus by using Lemma 3.1 we get that  $\nu^{(n)} < \infty$  for all  $n$ . And so we got a valid KKT stationarity condition for the  $q$  we found above. Therefore, the gradient flow satisfies the KKT conditions for minimizing the  $q$  we have found.  $\square$

### C.1. Validation of the use of the function $g$ as a “Time-Warping”

First, we show that Eq. 24 cannot take the form suggested by Eq. 4 (as in the standard IMD approach described in Section 3):

$$\mathbf{H}(\tilde{\mathbf{w}}(t)) \frac{d\tilde{\mathbf{w}}(t)}{dt} = \mathbf{X}\mathbf{r}(t)$$

where  $\mathbf{H}(\tilde{\mathbf{w}}(t)) = \nabla^2 Q(\tilde{\mathbf{w}}(t))$  for some  $Q$ .

From Eq. 24 we get that  $\mathbf{H}(\mathbf{w})$  takes the form

$$\mathbf{H}(\mathbf{w}) = \left( \frac{\delta}{2} + \sqrt{\frac{\delta^2}{4} + \|\mathbf{w}\|^2} \right)^{-1} \left( \mathbf{I} - \frac{\mathbf{w}\mathbf{w}^\top}{2 \left( \frac{\delta}{2} + \sqrt{\frac{\delta^2}{4} + \|\mathbf{w}\|^2} \right) \sqrt{\frac{\delta^2}{4} + \|\mathbf{w}\|^2}} \right).$$

Suppose  $\mathbf{H}(\mathbf{w})$  is indeed the Hessian of some  $Q(\mathbf{w})$ , then it must respect the Hessian-map condition (see Eq. 7) for any  $\delta \geq 0$ . Specifically, for  $\delta = 0$  we get

$$\mathbf{H}(\mathbf{w}) = \frac{1}{\|\mathbf{w}\|} \left( \mathbf{I} - \frac{\mathbf{w}\mathbf{w}^\top}{2\|\mathbf{w}\|^2} \right),$$

which does not satisfy the Hessian-map condition

$$\frac{\partial \mathbf{H}_{i,i}(\mathbf{w})}{\partial \mathbf{w}_j} = -\frac{w_j}{\|\mathbf{w}\|^3} + \frac{3 w_i^2 w_j}{2 \|\mathbf{w}\|^5} \neq -\frac{w_j}{2\|\mathbf{w}\|^3} + \frac{3 w_i^2 w_j}{2 \|\mathbf{w}\|^5} = \frac{\partial \mathbf{H}_{i,j}(\mathbf{w})}{\partial \mathbf{w}_i}.$$

Therefore, Eq. 24 cannot be solved using the standard IMD approach, and requires our suggested “warped IMD” technique (see Section 5).

Second, we write  $g(\tilde{\mathbf{w}}_i(t))$  explicitly and show it is positive, monotone and bounded.

From Eq. 24 we have

$$g(\tilde{\mathbf{w}}_i(t)) = \frac{\hat{q}'(\|\tilde{\mathbf{w}}_i(t)\|)}{\|\tilde{\mathbf{w}}_i(t)\|} \left( \frac{\delta_i}{2} + \sqrt{\frac{\delta_i^2}{4} + \|\tilde{\mathbf{w}}_i(t)\|^2} \right) = \frac{1}{\|\tilde{\mathbf{w}}_i(t)\|} \sqrt{\sqrt{\|\tilde{\mathbf{w}}_i(t)\|^2 + \frac{\delta_i^2}{4}} - \frac{\delta_i}{2}} \left( \frac{\delta_i}{2} + \sqrt{\frac{\delta_i^2}{4} + \|\tilde{\mathbf{w}}_i(t)\|^2} \right).$$

We can see that  $g(\tilde{\mathbf{w}}_i(t)) = \hat{g}(\|\tilde{\mathbf{w}}_i(t)\|)$  where

$$\hat{g}(x) = \frac{\sqrt{\sqrt{x^2 + \frac{\delta_i^2}{4}} - \frac{\delta_i}{2}}}{x} \left( \frac{\delta_i}{2} + \sqrt{\frac{\delta_i^2}{4} + x^2} \right).$$

We notice that  $\hat{g}(x)$  is smooth and positive for  $\forall x > 0$ , and since  $\lim_{x \rightarrow 0^+} \hat{g}(x) = \sqrt{\delta_i}$  (see Lemma H.3) it is also bounded for any finite  $x$ .

Also, using

$$\hat{g}'(x) = \frac{2\sqrt{x^2 + \frac{\delta_i^2}{4}} - \delta_i}{4\sqrt{x^2 + \frac{\delta_i^2}{4}} \sqrt{\sqrt{x^2 + \frac{\delta_i^2}{4}} - \frac{\delta_i}{2}}}$$

we see that  $\hat{g}'(x) > 0, \forall x > 0$  and so  $\hat{g}(x)$  is monotonically increasing.



### C.2. Verification of the Hessian map condition

Finally, we show that  $g(\tilde{\mathbf{w}}(t))\mathbf{H}(\tilde{\mathbf{w}}(t))$  does satisfy the Hessian-map condition. We note that this is immediate from the construction of  $g$ , but provide it here for completeness.

$$g(\mathbf{w})\mathbf{H}(\mathbf{w}) = \frac{1}{\|\mathbf{w}\|} \sqrt{\sqrt{\|\mathbf{w}\|^2 + \frac{\delta^2}{4}} - \frac{\delta}{2}} \left( \mathbf{I} - \frac{\mathbf{w}\mathbf{w}^\top}{2 \left( \frac{\delta}{2} + \sqrt{\frac{\delta^2}{4} + \|\mathbf{w}\|^2} \right) \sqrt{\frac{\delta^2}{4} + \|\mathbf{w}\|^2}} \right).$$

We denote  $f(x) = \frac{1}{x} \sqrt{\sqrt{x^2 + \frac{\delta^2}{4}} - \frac{\delta}{2}}$  and  $h(x) = \frac{f(x)}{2 \left( \frac{\delta}{2} + \sqrt{\frac{\delta^2}{4} + x^2} \right) \sqrt{\frac{\delta^2}{4} + x^2}}$ .

Without loss of generality it is enough to observe the following settings:

$i \neq j \neq k$ :

$$\frac{\partial \mathbf{H}_{i,j}(\mathbf{w})}{\partial \mathbf{w}_k} = -w_i w_j h'(\|\mathbf{w}\|) \frac{w_k}{\|\mathbf{w}\|} = -w_i w_k h'(\|\mathbf{w}\|) \frac{w_j}{\|\mathbf{w}\|} = \frac{\partial \mathbf{H}_{i,k}(\mathbf{w})}{\partial \mathbf{w}_j}$$

$i = j \neq k$ :

$$\begin{aligned} \frac{\partial \mathbf{H}_{i,i}(\mathbf{w})}{\partial \mathbf{w}_k} &= f'(\|\mathbf{w}\|) \frac{w_k}{\|\mathbf{w}\|} - w_i^2 h'(\|\mathbf{w}\|) \frac{w_k}{\|\mathbf{w}\|} \\ \frac{\partial \mathbf{H}_{i,k}(\mathbf{w})}{\partial \mathbf{w}_i} &= -w_k h(\|\mathbf{w}\|) - w_i w_k h'(\|\mathbf{w}\|) \frac{w_i}{\|\mathbf{w}\|} = -w_k h(\|\mathbf{w}\|) - w_i^2 h'(\|\mathbf{w}\|) \frac{w_k}{\|\mathbf{w}\|} \end{aligned}$$

Therefore, if  $\forall x, \frac{f'(x)}{x} = -h(x)$  we get that  $\frac{\partial \mathbf{H}_{i,i}(\mathbf{w})}{\partial \mathbf{w}_k} = \frac{\partial \mathbf{H}_{i,k}(\mathbf{w})}{\partial \mathbf{w}_i}$ .

Using the derivative of  $f(x)$  we can write:

$$\begin{aligned} f'(x) &= \frac{1}{2\sqrt{x^2 + \frac{\delta^2}{4}} \sqrt{\sqrt{x^2 + \frac{\delta^2}{4}} - \frac{\delta}{2}}} - \frac{\sqrt{\sqrt{x^2 + \frac{\delta^2}{4}} - \frac{\delta}{2}}}{x^2} \\ &= \frac{1}{2\sqrt{x^2 + \frac{\delta^2}{4}} \sqrt{\sqrt{x^2 + \frac{\delta^2}{4}} - \frac{\delta}{2}}} - \frac{\sqrt{\sqrt{x^2 + \frac{\delta^2}{4}} - \frac{\delta}{2}}}{\left(\sqrt{x^2 + \frac{\delta^2}{4}} - \frac{\delta}{2}\right) \left(\sqrt{x^2 + \frac{\delta^2}{4}} + \frac{\delta}{2}\right)} \\ &= \frac{1}{2\sqrt{x^2 + \frac{\delta^2}{4}} \sqrt{\sqrt{x^2 + \frac{\delta^2}{4}} - \frac{\delta}{2}}} - \frac{1}{\sqrt{\sqrt{x^2 + \frac{\delta^2}{4}} - \frac{\delta}{2}} \left(\sqrt{x^2 + \frac{\delta^2}{4}} + \frac{\delta}{2}\right)} \\ &= \frac{\left(\sqrt{x^2 + \frac{\delta^2}{4}} + \frac{\delta}{2}\right) - 2\sqrt{x^2 + \frac{\delta^2}{4}}}{2\sqrt{x^2 + \frac{\delta^2}{4}} \sqrt{\sqrt{x^2 + \frac{\delta^2}{4}} - \frac{\delta}{2}} \left(\sqrt{x^2 + \frac{\delta^2}{4}} + \frac{\delta}{2}\right)} \\ &= -\frac{\sqrt{\sqrt{x^2 + \frac{\delta^2}{4}} - \frac{\delta}{2}}}{2\sqrt{x^2 + \frac{\delta^2}{4}} \left(\sqrt{x^2 + \frac{\delta^2}{4}} + \frac{\delta}{2}\right)} \\ &= -x \cdot h(x), \end{aligned}$$

and so  $g(\mathbf{w})\mathbf{H}(\mathbf{w})$  respects the Hessian-map condition.

## D. Proof of Proposition 6.2

*Proof.* We recall that the fully connected linear network of depth 2 is defined as

$$f(\mathbf{x}; \{a_i\}, \{\mathbf{w}_i\}) = \sum_{i=1}^m a_i \mathbf{w}_i^\top \mathbf{x} = \tilde{\mathbf{w}}^\top \mathbf{x},$$

where  $\tilde{\mathbf{w}} \triangleq \sum_{i=1}^m \tilde{\mathbf{w}}_i$ , and  $\tilde{\mathbf{w}}_i \triangleq a_i \mathbf{w}_i$ .

Returning to the dynamics of model parameters (Eq. 22) we have

$$\frac{d}{dt} \tilde{\mathbf{w}}_i(t) = \dot{a}_i \mathbf{w}_i + a_i \dot{\mathbf{w}}_i = (a_i^2 \mathbf{I} + \mathbf{w}_i \mathbf{w}_i^\top) \left( \sum_{n=1}^N \mathbf{x}^{(n)} r^{(n)} \right).$$

Therefore,

$$\begin{aligned} \frac{d}{dt} \tilde{\mathbf{w}}(t) &= \left( \sum_{i=1}^m a_i^2 \mathbf{I} + \sum_{i=1}^m \mathbf{w}_i \mathbf{w}_i^\top \right) \left( \sum_{n=1}^N \mathbf{x}^{(n)} r^{(n)} \right) \\ \left( \sum_{i=1}^m a_i^2(t) \mathbf{I} + \sum_{i=1}^m \mathbf{w}_i(t) \mathbf{w}_i(t)^\top \right)^{-1} \frac{d}{dt} \tilde{\mathbf{w}}(t) &= \left( \sum_{n=1}^N \mathbf{x}^{(n)} r^{(n)} \right). \end{aligned}$$

We can notice that we can express

$$\sum_{i=1}^m a_i^2(t) \mathbf{I} + \sum_{i=1}^m \mathbf{w}_i(t) \mathbf{w}_i(t)^\top = \mathbf{A}(t) + \mathbf{U}(t) \mathbf{C} \mathbf{V}(t)$$

where

$$\begin{aligned} \mathbf{A}(t) &= \left( \sum_{i=1}^m a_i^2(t) \right) \mathbf{I}_{d \times d} \\ \mathbf{C} &= \mathbf{I}_{m \times m} \\ \mathbf{U}(t) &= \mathbf{W}(t) \triangleq [\mathbf{w}_1(t), \dots, \mathbf{w}_m(t)] \in \mathbb{R}^{d \times m} \\ \mathbf{V}(t) &= \mathbf{W}(t)^\top = [\mathbf{w}_1(t)^\top; \dots; \mathbf{w}_m(t)^\top] \in \mathbb{R}^{m \times d}. \end{aligned}$$

By using the Woodbury matrix identity we can write

$$\begin{aligned} \left( \sum_{i=1}^m a_i^2(t) \mathbf{I} + \sum_{i=1}^m \mathbf{w}_i(t) \mathbf{w}_i(t)^\top \right)^{-1} &= \mathbf{A}^{-1} - \mathbf{A}^{-1} \mathbf{U} (\mathbf{I} + \mathbf{V} \mathbf{A}^{-1} \mathbf{U})^{-1} \mathbf{V} \mathbf{A}^{-1} = \\ &= \mathbf{A}^{-1} - \mathbf{A}^{-1} \mathbf{U} \left( \left( \sum_{i=1}^m a_i^2(t) \right) \mathbf{I} + \mathbf{V} \mathbf{U} \right)^{-1} \mathbf{V}. \end{aligned}$$

From Theorem 2.2 of Du et al. (2018) (stated in Section 6) we get that

$$\mathbf{a}(t) \cdot \mathbf{a}(t)^\top = \mathbf{W}(t)^\top \mathbf{W}(t) + \mathbf{\Delta},$$

where  $\mathbf{\Delta} \in \mathbb{R}^{m \times m}$ .

For the case of strict balanced initialization we have  $\mathbf{\Delta} = 0$ , and therefore

$$\begin{aligned} \left( \left( \sum_{i=1}^m a_i^2(t) \right) \mathbf{I} + \mathbf{V}(t) \mathbf{U}(t) \right)^{-1} &= \left( \left( \sum_{i=1}^m a_i^2(t) \right) \mathbf{I} + \mathbf{W}(t)^\top \mathbf{W}(t) \right)^{-1} = \\ &= \left( \left( \sum_{i=1}^m a_i^2(t) \right) \mathbf{I} + \mathbf{a}(t) \mathbf{a}(t)^\top \right)^{-1} \\ &= \left( \sum_{i=1}^m a_i^2(t) \right)^{-1} \mathbf{I} - \frac{\mathbf{a}(t) \mathbf{a}(t)^\top}{2 (\sum_{i=1}^m a_i^2(t))^2}, \end{aligned}$$

where in the last transition we used the Sherman-Morrison lemma. It follows that

$$\begin{aligned} & \left( \sum_{i=1}^m a_i^2(t) \mathbf{I} + \sum_{i=1}^m \mathbf{w}_i(t) \mathbf{w}_i(t)^\top \right)^{-1} = \\ & = \left( \sum_{i=1}^m a_i^2(t) \right)^{-1} \left( \mathbf{I} - \mathbf{W}(t) \left( \left( \sum_{i=1}^m a_i^2(t) \right)^{-1} \mathbf{I} - \frac{\mathbf{a}(t) \mathbf{a}(t)^\top}{2 \left( \sum_{i=1}^m a_i^2(t) \right)^2} \right) \mathbf{W}(t)^\top \right). \end{aligned}$$

We continue and write

$$\begin{aligned} & \left( \sum_{i=1}^m a_i^2(t) \mathbf{I} + \sum_{i=1}^m \mathbf{w}_i(t) \mathbf{w}_i(t)^\top \right)^{-1} = \\ & = \left( \sum_{i=1}^m a_i^2(t) \right)^{-1} \left( \mathbf{I} - \left( \sum_{i=1}^m a_i^2(t) \right)^{-1} \mathbf{W}(t) \mathbf{W}(t)^\top + \frac{1}{2} \left( \sum_{i=1}^m a_i^2(t) \right)^{-2} \left( \mathbf{W}(t) \mathbf{W}(t)^\top \right)^2 \right). \end{aligned}$$

Using Theorem 2.1 of Du et al. (2018) (stated in Section 6), we know that

$$a_i(t)^2 = \|\mathbf{w}_i(t)\|^2.$$

Therefore,

$$\|\tilde{\mathbf{w}}_i(t)\| = |a_i(t)| \|\mathbf{w}_i(t)\| = a_i(t)^2$$

and

$$\sum_{i=1}^m a_i^2(t) = \sum_{i=1}^m \|\tilde{\mathbf{w}}_i(t)\|.$$

So, we can write

$$\begin{aligned} & \left( \sum_{i=1}^m a_i^2(t) \mathbf{I} + \sum_{i=1}^m \mathbf{w}_i(t) \mathbf{w}_i(t)^\top \right)^{-1} = \\ & = \left( \sum_{i=1}^m a_i^2(t) \right)^{-1} \left( \mathbf{I} - \left( \sum_{i=1}^m a_i^2(t) \right)^{-1} \left( \sum_{i=1}^m \mathbf{w}_i(t) \mathbf{w}_i(t)^\top \right) + \frac{1}{2} \left( \sum_{i=1}^m a_i^2(t) \right)^{-2} \left( \sum_{i=1}^m \mathbf{w}_i(t) \mathbf{w}_i(t)^\top \right)^2 \right) = \\ & = \left( \sum_{i=1}^m \|\tilde{\mathbf{w}}_i(t)\| \right)^{-1} \left( \mathbf{I} - \left( \sum_{i=1}^m \|\tilde{\mathbf{w}}_i(t)\| \right)^{-1} \left( \sum_{i=1}^m \frac{\tilde{\mathbf{w}}_i(t) \tilde{\mathbf{w}}_i(t)^\top}{\|\tilde{\mathbf{w}}_i(t)\|} \right) + \frac{1}{2} \left( \sum_{i=1}^m \|\tilde{\mathbf{w}}_i(t)\| \right)^{-2} \left( \sum_{i=1}^m \frac{\tilde{\mathbf{w}}_i(t) \tilde{\mathbf{w}}_i(t)^\top}{\|\tilde{\mathbf{w}}_i(t)\|} \right)^2 \right). \end{aligned}$$

Now, since

$$\mathbf{a}(t) \mathbf{a}(t)^\top = \mathbf{W}(t)^\top \mathbf{W}(t),$$

we can say that  $\mathbf{W}(t)^\top \mathbf{W}(t)$  is a rank one matrix, and therefore also  $\mathbf{W}(t)$ , and also  $\tilde{\mathbf{W}}(t)$ .

Therefore, all  $\tilde{\mathbf{w}}_i$  are equal up to a multiplicative factor,

$$\tilde{\mathbf{w}}_i(t) = c_i(t) \tilde{\mathbf{w}}(t)$$

where from definition

$$\sum_{i=1}^m c_i(t) = 1.$$

Therefore,

$$\begin{aligned} & \|\tilde{\mathbf{w}}_i(t)\| = |c_i(t)| \|\tilde{\mathbf{w}}(t)\| \\ & \Rightarrow \sum_{i=1}^m \|\tilde{\mathbf{w}}_i(t)\| = \left( \sum_{i=1}^m |c_i(t)| \right) \|\tilde{\mathbf{w}}(t)\| \end{aligned}$$

$$\Rightarrow \sum_{i=1}^m \frac{\tilde{\mathbf{w}}_i(t) \tilde{\mathbf{w}}_i(t)^\top}{\|\tilde{\mathbf{w}}_i(t)\|} = \left( \sum_{i=1}^m |c_i(t)| \right) \frac{\tilde{\mathbf{w}}(t) \tilde{\mathbf{w}}(t)^\top}{\|\tilde{\mathbf{w}}(t)\|},$$

giving us

$$\begin{aligned} & \left( \sum_{i=1}^m a_i^2(t) \mathbf{I} + \sum_{i=1}^m \mathbf{w}_i(t) \mathbf{w}_i(t)^\top \right)^{-1} \frac{d}{dt} \tilde{\mathbf{w}}(t) = \\ & = \frac{1}{\left( \sum_{i=1}^m |c_i(t)| \right) \|\tilde{\mathbf{w}}(t)\|} \frac{1}{\|\tilde{\mathbf{w}}(t)\|} \left( \mathbf{I} - \frac{\tilde{\mathbf{w}}(t) \tilde{\mathbf{w}}(t)^\top}{\|\tilde{\mathbf{w}}(t)\|^2} + \frac{1}{2} \left( \frac{\tilde{\mathbf{w}}(t) \tilde{\mathbf{w}}(t)^\top}{\|\tilde{\mathbf{w}}(t)\|^2} \right)^2 \right) \frac{d}{dt} \tilde{\mathbf{w}}(t) = \sum_{n=1}^N \mathbf{x}^{(n)} r^{(n)} \\ & \Rightarrow \frac{1}{\left( \sum_{i=1}^m |c_i(t)| \right) \|\tilde{\mathbf{w}}(t)\|} \frac{1}{\|\tilde{\mathbf{w}}(t)\|} \left( \mathbf{I} - \frac{1}{2} \frac{\tilde{\mathbf{w}}(t) \tilde{\mathbf{w}}(t)^\top}{\|\tilde{\mathbf{w}}(t)\|^2} \right) \frac{d}{dt} \tilde{\mathbf{w}}(t) = \sum_{n=1}^N \mathbf{x}^{(n)} r^{(n)}, \end{aligned}$$

where in the last transition we used

$$\left( \frac{\tilde{\mathbf{w}}(t) \tilde{\mathbf{w}}(t)^\top}{\|\tilde{\mathbf{w}}(t)\|^2} \right)^2 = \frac{\tilde{\mathbf{w}}(t) \tilde{\mathbf{w}}(t)^\top \tilde{\mathbf{w}}(t) \tilde{\mathbf{w}}(t)^\top}{\|\tilde{\mathbf{w}}(t)\|^4} = \frac{\tilde{\mathbf{w}}(t) \tilde{\mathbf{w}}(t)^\top}{\|\tilde{\mathbf{w}}(t)\|^2}.$$

We follow the "warped IMD" technique (presented in detail in Section 5) and multiply the equation by some function  $g(\tilde{\mathbf{w}}_i(t))$

$$\frac{g(\tilde{\mathbf{w}}(t))}{\left( \sum_{i=1}^m |c_i(t)| \right) \|\tilde{\mathbf{w}}(t)\|} \frac{1}{\|\tilde{\mathbf{w}}(t)\|} \left( \mathbf{I} - \frac{1}{2} \frac{\tilde{\mathbf{w}}(t) \tilde{\mathbf{w}}(t)^\top}{\|\tilde{\mathbf{w}}(t)\|^2} \right) \frac{d}{dt} \tilde{\mathbf{w}}(t) = \left( \sum_{n=1}^N \mathbf{x}^{(n)} g(\tilde{\mathbf{w}}(t)) r^{(n)} \right).$$

Following the approach in Section 5, we then try and find  $q(\tilde{\mathbf{w}}_i(t)) = \hat{q}(\|\tilde{\mathbf{w}}_i(t)\|) + \mathbf{z}^\top \tilde{\mathbf{w}}_i(t)$  and  $g(\tilde{\mathbf{w}}_i(t))$  such that

$$\nabla^2 q(\tilde{\mathbf{w}}(t)) = \frac{g(\tilde{\mathbf{w}}(t))}{\left( \sum_{i=1}^m |c_i(t)| \right) \|\tilde{\mathbf{w}}(t)\|} \frac{1}{\|\tilde{\mathbf{w}}(t)\|} \left( \mathbf{I} - \frac{1}{2} \frac{\tilde{\mathbf{w}}(t) \tilde{\mathbf{w}}(t)^\top}{\|\tilde{\mathbf{w}}(t)\|^2} \right), \quad (26)$$

so that then we'll have

$$\begin{aligned} \nabla^2 q(\tilde{\mathbf{w}}(t)) \frac{d}{dt} \tilde{\mathbf{w}}(t) &= \sum_{n=1}^N \mathbf{x}^{(n)} g(\tilde{\mathbf{w}}(t)) r^{(n)}(t) \\ \frac{d}{dt} (\nabla q(\tilde{\mathbf{w}}(t))) &= \sum_{n=1}^N \mathbf{x}^{(n)} g(\tilde{\mathbf{w}}(t)) r^{(n)}(t) \\ \nabla q(\tilde{\mathbf{w}}(t)) - \nabla q(\tilde{\mathbf{w}}(0)) &= \sum_{n=1}^N \mathbf{x}^{(n)} \int_0^t g(\tilde{\mathbf{w}}(t')) r^{(n)}(t') dt'. \end{aligned}$$

Assuming  $\nabla q(\tilde{\mathbf{w}}(0)) = 0$ , and denoting  $\nu^{(n)} = \int_0^\infty g(\tilde{\mathbf{w}}(t')) r^{(n)}(t') dt'$ , we get the condition

$$\nabla q(\tilde{\mathbf{w}}(\infty)) = \sum_{n=1}^N \mathbf{x}^{(n)} \nu^{(n)}.$$

To find  $q$  we note that

$$\nabla q(\tilde{\mathbf{w}}(t)) = \hat{q}'(\|\tilde{\mathbf{w}}(t)\|) \frac{\tilde{\mathbf{w}}(t)}{\|\tilde{\mathbf{w}}(t)\|} + \mathbf{z}$$

and

$$\begin{aligned} \nabla^2 q(\tilde{\mathbf{w}}(t)) &= \left[ \hat{q}''(\|\tilde{\mathbf{w}}(t)\|) - \hat{q}'(\|\tilde{\mathbf{w}}(t)\|) \frac{1}{\|\tilde{\mathbf{w}}(t)\|} \right] \frac{\tilde{\mathbf{w}}(t) \tilde{\mathbf{w}}^\top(t)}{\|\tilde{\mathbf{w}}(t)\|^2} + \hat{q}'(\|\tilde{\mathbf{w}}(t)\|) \frac{1}{\|\tilde{\mathbf{w}}(t)\|} \mathbf{I} \\ &= \frac{\hat{q}'(\|\tilde{\mathbf{w}}(t)\|)}{\|\tilde{\mathbf{w}}(t)\|} \left[ \mathbf{I} - \left[ 1 - \|\tilde{\mathbf{w}}(t)\| \frac{\hat{q}''(\|\tilde{\mathbf{w}}(t)\|)}{\hat{q}'(\|\tilde{\mathbf{w}}(t)\|)} \right] \frac{\tilde{\mathbf{w}}(t) \tilde{\mathbf{w}}^\top(t)}{\|\tilde{\mathbf{w}}(t)\|^2} \right]. \end{aligned}$$

Comparing the form above with the Hessian in Eq. 26 we require

$$\frac{g(\tilde{\mathbf{w}}(t))}{(\sum_{i=1}^m |c_i(t)|)} = \hat{q}'(\|\tilde{\mathbf{w}}(t)\|),$$

and

$$\begin{aligned} 1 - \|\tilde{\mathbf{w}}(t)\| \frac{\hat{q}''(\|\tilde{\mathbf{w}}(t)\|)}{\hat{q}'(\|\tilde{\mathbf{w}}(t)\|)} &= \frac{1}{2} \\ \Rightarrow \frac{\hat{q}''(x)}{\hat{q}'(x)} &= \frac{1}{2x} \\ \log \hat{q}'(x) &= \frac{1}{2} \ln x + C \\ \hat{q}'(x) &= C\sqrt{x}. \end{aligned}$$

Therefore,

$$q(\tilde{\mathbf{w}}(t)) = C \|\tilde{\mathbf{w}}(t)\|^{3/2} + \mathbf{z}^\top \tilde{\mathbf{w}}(t) + C',$$

and using the condition  $\nabla q(\tilde{\mathbf{w}}(0)) = 0$  we get

$$q(\tilde{\mathbf{w}}(t)) = C \|\tilde{\mathbf{w}}(t)\|^{3/2} - C \frac{3}{2} \|\tilde{\mathbf{w}}(0)\|^{-1/2} \tilde{\mathbf{w}}(0)^\top \tilde{\mathbf{w}}(t) + C'.$$

We can set  $C = 1$ ,  $C' = 0$  and get

$$q(\tilde{\mathbf{w}}(t)) = \|\tilde{\mathbf{w}}(t)\|^{3/2} - \frac{3}{2} \|\tilde{\mathbf{w}}(0)\|^{-1/2} \tilde{\mathbf{w}}(0)^\top \tilde{\mathbf{w}}(t).$$

We note that  $\|\nabla q(\tilde{\mathbf{w}})\| < \infty$  when  $\|\tilde{\mathbf{w}}\| < \infty$ , and thus by using Lemma 3.1 we get that  $\hat{\nu}^{(n)} < \infty$  for all  $n$ . Therefore, gradient flow satisfies the KKT conditions for minimizing this  $q$ .  $\square$

## E. Proof of Theorem 6.3

We recall the proof of Theorem 6.1 given in Appendix C.

The form of the  $q$  function described in the proof is  $q(\tilde{\mathbf{w}}_i(t)) = \hat{q}(\|\tilde{\mathbf{w}}_i(t)\|) + \mathbf{z}^\top \tilde{\mathbf{w}}_i(t)$ , where

$$\mathbf{z} = -\frac{3}{2} \sqrt{\sqrt{\|\tilde{\mathbf{w}}(0)\|^2 + \frac{\delta^2}{4}} - \frac{\delta}{2} \frac{\tilde{\mathbf{w}}(0)}{\|\tilde{\mathbf{w}}(0)\|}}.$$

Under the limit  $\|\tilde{\mathbf{w}}_i(0)\| \rightarrow 0$  we can see that  $\|\mathbf{z}\| \rightarrow 0$ .

When the linear term captured by  $\mathbf{z}$  in the  $q$  function is equal to zero, we have

$$\nabla q(\tilde{\mathbf{w}}_i(\infty)) = \hat{q}'(\|\tilde{\mathbf{w}}_i(\infty)\|) \frac{\tilde{\mathbf{w}}_i(\infty)}{\|\tilde{\mathbf{w}}_i(\infty)\|} = \sum_n \mathbf{x}^{(n)} \nu_i^{(n)}.$$

Defining  $\hat{\nu}_i^{(n)} = \frac{\nu_i^{(n)} \|\tilde{\mathbf{w}}_i(\infty)\|}{\hat{q}'(\|\tilde{\mathbf{w}}_i(\infty)\|)}$  we get

$$\tilde{\mathbf{w}}_i(\infty) = \sum_n \mathbf{x}^{(n)} \hat{\nu}_i^{(n)}.$$

We notice that

$$\hat{q}'(x) = \sqrt{\sqrt{x^2 + \frac{\delta_i^2}{4}} - \frac{\delta_i}{2}}$$

Using the linear predictor definition of  $\tilde{\mathbf{w}}(\infty) = \sum_i \tilde{\mathbf{w}}_i(\infty)$ , denoting  $\hat{\nu}^{(n)} = \sum_i \hat{\nu}_i^{(n)}$  and summing over  $i$  gives

$$\tilde{\mathbf{w}}(\infty) = \sum_n \mathbf{x}^{(n)} \hat{\nu}^{(n)}$$

We note that  $\|\nabla q(\tilde{\mathbf{w}})\| < \infty$  when  $\|\tilde{\mathbf{w}}\| < \infty$ , and thus by using Lemma 3.1 we get that  $\hat{\nu}^{(n)} < \infty$  for all  $n$ . Therefore, the above is a valid KKT stationarity condition of the form  $\nabla q(\tilde{\mathbf{w}}(\infty)) = \sum_n \mathbf{x}^{(n)} \hat{\nu}^{(n)}$  with  $\nabla q(\mathbf{w}) = \mathbf{w}$ . Hence, gradient flow satisfies the KKT conditions for minimizing this  $q$ .

It follows that for a multi-neuron fully connected network with non-zero infinitesimal initialization,

$$\tilde{\mathbf{w}}(\infty) = \operatorname{argmin}_{\mathbf{w}} \|\mathbf{w}\|^2 \quad \text{s.t. } \mathbf{X}^\top \mathbf{w} = \mathbf{y}$$

which is equivalent to

$$\tilde{\mathbf{w}}(\infty) = \operatorname{argmin}_{\mathbf{w}} \|\mathbf{w}\| \quad \text{s.t. } \mathbf{X}^\top \mathbf{w} = \mathbf{y} .$$

## F. Characterization of the Implicit Bias Captured in Theorem 4.1

In this Appendix we provide a detailed characterization of the implicit bias for a diagonal linear network as described in Theorem 4.1,

$$\tilde{\mathbf{w}}(\infty) = \operatorname{argmin}_{\mathbf{w}} Q_{\mathbf{k}}(\mathbf{w}) \quad \text{s.t. } \mathbf{X}^\top \mathbf{w} = \mathbf{y}$$

where

$$Q_{\mathbf{k}}(\mathbf{w}) = \sum_{i=1}^d q_{k_i}(w_i) ,$$

$$q_k(x) = \frac{\sqrt{k}}{4} \left[ 1 - \sqrt{1 + \frac{4x^2}{k}} + \frac{2x}{\sqrt{k}} \operatorname{arcsinh} \left( \frac{2x}{\sqrt{k}} \right) \right]$$

and

$$\sqrt{k_i} = \frac{4\alpha_i (1 + s_i^2)}{1 - s_i^2} .$$

For simplicity, we next assume  $\alpha_i = \alpha$ ,  $s_i = s \forall i \in [d]$ .

We can notice that for  $k \rightarrow \infty$ , i.e.  $\frac{\alpha}{1-s^2} \rightarrow \infty$  we get that:

$$\begin{aligned} q_k(w_i) &\xrightarrow{k \rightarrow \infty} \frac{w_i^2}{\sqrt{k}} = \frac{1}{2(u_{+,i}^2(0) + v_{+,i}^2(0))} w_i^2 \\ \Rightarrow Q_{\mathbf{k}}(\mathbf{w}) &= \sum_{i=1}^d q_k(w_i) = \sum_{i=1}^d \frac{1}{2(u_{+,i}^2(0) + v_{+,i}^2(0))} w_i^2 . \end{aligned}$$

Calculating the tangent kernel at the initialization we get

$$\begin{aligned} K(\mathbf{x}_1, \mathbf{x}_2) &= \langle \nabla f(\mathbf{x}_1), \nabla f(\mathbf{x}_2) \rangle \\ &= \langle [\mathbf{x}_1 \circ \mathbf{u}_+(0), \mathbf{x}_1 \circ \mathbf{v}_+(0), -\mathbf{x}_1 \circ \mathbf{u}_-(0), -\mathbf{x}_1 \circ \mathbf{v}_-(0)], \\ &\quad [\mathbf{x}_2 \circ \mathbf{u}_+(0), \mathbf{x}_2 \circ \mathbf{v}_+(0), -\mathbf{x}_2 \circ \mathbf{u}_-(0), -\mathbf{x}_2 \circ \mathbf{v}_-(0)] \rangle \\ &= \mathbf{x}_1^\top \operatorname{diag}(\mathbf{u}_+^2(0) + \mathbf{v}_+^2(0) + \mathbf{u}_-^2(0) + \mathbf{v}_-^2(0)) \mathbf{x}_2 . \end{aligned}$$

For the case of unbiased initialization ( $u_{+,i}(0) = u_{-,i}(0)$ ,  $v_{+,i}(0) = v_{-,i}(0)$ ) we have

$$K(\mathbf{x}_1, \mathbf{x}_2) = 2\mathbf{x}_1^\top \operatorname{diag}(\mathbf{u}_+^2(0) + \mathbf{v}_+^2(0)) \mathbf{x}_2 .$$

Therefore, using Lemma H.4, we can see that  $Q_k(\mathbf{w})$  is the RKHS norm with respect to the NTK at initialization. Therefore,  $k \rightarrow \infty$  indeed describes the NTK regime.

For  $k \rightarrow 0$ , i.e.  $\frac{\alpha}{1-s^2} \rightarrow 0$  we get that:

$$\begin{aligned}
 q_k(w_i) &= \frac{\sqrt{k}}{4} \left[ 1 - \sqrt{1 + \frac{4w_i^2}{k}} + \frac{2w_i}{\sqrt{k}} \operatorname{arcsinh} \left( \frac{2w_i}{\sqrt{k}} \right) \right] \\
 &= \frac{\sqrt{k}}{4} - \sqrt{\frac{k}{16} + \frac{w_i^2}{4}} + \frac{w_i}{2} \operatorname{arcsinh} \left( \frac{2w_i}{\sqrt{k}} \right) \\
 &\xrightarrow{k \rightarrow 0} \frac{|w_i|}{2} + \frac{|w_i|}{2} \log \left( \frac{4|w_i|}{\sqrt{k}} \right) \\
 &= \frac{1}{2} \left[ -|w_i| + |w_i| \log \left( \frac{4|w_i|}{\sqrt{k}} \right) \right] \\
 &= \frac{1}{2} \left[ |w_i| \log \left( \frac{1}{\sqrt{k}} \right) + |w_i| (\log(4|w_i|) - 1) \right] \\
 \\
 &\Rightarrow \frac{q_k(w_i)}{\frac{1}{2} \log \left( \frac{1}{\sqrt{k}} \right)} \rightarrow |w_i| + \frac{|w_i| (\log(4|w_i|) - 1)}{\log \left( \frac{1}{\sqrt{k}} \right)} \\
 &= |w_i| + O \left( \frac{1}{\log \left( \frac{1}{\sqrt{k}} \right)} \right) \rightarrow |w_i|
 \end{aligned}$$

Therefore,

$$Q_k(\mathbf{w}) = \sum_{i=1}^d |w_i| = \|\mathbf{w}\|_1$$

and  $k \rightarrow 0$  describes the rich regime (Woodworth et al., 2020).

## G. Characterization of the Implicit Bias Captured in Theorem 6.1

In this Appendix we provide a detailed characterization of the implicit bias for a two-layer fully connected neural network with a single hidden neuron ( $m = 1$ ) described in Theorem 6.1,

$$\tilde{\mathbf{w}}(\infty) = \arg \min_{\mathbf{w}} q(\mathbf{w}) \quad \text{s.t. } \mathbf{X}^\top \mathbf{w} = \mathbf{y}$$

$$q(\tilde{\mathbf{w}}) = \hat{q}(\|\tilde{\mathbf{w}}\|) + \mathbf{z}^\top \tilde{\mathbf{w}},$$

where

$$\begin{aligned}
 \hat{q}(x) &= \frac{\left( x^2 - \frac{\delta}{2} \left( \frac{\delta}{2} + \sqrt{x^2 + \frac{\delta^2}{4}} \right) \right) \sqrt{\sqrt{x^2 + \frac{\delta^2}{4}} - \frac{\delta}{2}}}{x} \\
 \mathbf{z} &= -\frac{3}{2} \sqrt{\sqrt{\|\tilde{\mathbf{w}}(0)\|^2 + \frac{\delta^2}{4}} - \frac{\delta}{2}} \frac{\tilde{\mathbf{w}}(0)}{\|\tilde{\mathbf{w}}(0)\|}.
 \end{aligned}$$

Note that for the sake of simplicity the notations above are an abbreviated version of those found Theorem 6.1.

We will employ the initialization orientation, defined as  $\mathbf{u} = \frac{\mathbf{w}(0)}{\|\mathbf{w}(0)\|}$ , and the initialization scale,  $\|\tilde{\mathbf{w}}(0)\| = \alpha$ .

**G.1. The case  $\alpha \rightarrow 0$  for any  $0 \leq s < 1$** 

Note that from Lemma H.2 (part 2) we have

$$\|\mathbf{z}\| = \frac{3}{2} \sqrt{\sqrt{\|\tilde{\mathbf{w}}(0)\|^2 + \frac{\delta^2}{4}} - \frac{\delta}{2}} = \frac{3}{2} \sqrt{\sqrt{\alpha^2 + \frac{\delta^2}{4}} - \frac{\delta}{2}} = \frac{3}{2} \sqrt{\alpha \frac{1-s}{1+s}},$$

and thus for any  $0 \leq s < 1$  when  $\alpha \rightarrow 0$  we get that  $\|\mathbf{z}\| \rightarrow 0$ . It follows that  $q_\delta(\tilde{\mathbf{w}}) = \hat{q}(\|\tilde{\mathbf{w}}\|)$  and since  $\hat{q}(x)$  is a monotonically increasing function (for any  $\delta$ ) we get the  $\ell_2$  implicit bias,

$$\tilde{\mathbf{w}}(\infty) = \arg \min_{\tilde{\mathbf{w}}} (q_\delta(\tilde{\mathbf{w}})) = \arg \min_{\tilde{\mathbf{w}}} (\hat{q}(\|\tilde{\mathbf{w}}\|)) = \arg \min_{\tilde{\mathbf{w}}} \|\tilde{\mathbf{w}}\|.$$

We call this regime the *Anti-NTK* regime.

**G.2. Other special cases**

Here we analyze the Taylor expansion of  $q(\tilde{\mathbf{w}})$  around  $\tilde{\mathbf{w}}(0)$ . To this end, we know that

$$\nabla^2 q(\tilde{\mathbf{w}}) = \frac{\hat{q}'(\|\tilde{\mathbf{w}}\|)}{\|\tilde{\mathbf{w}}\|} \left( \mathbf{I} - \frac{\tilde{\mathbf{w}}\tilde{\mathbf{w}}^\top}{2 \left( \frac{\delta}{2} + \sqrt{\frac{\delta^2}{4} + \|\tilde{\mathbf{w}}\|^2} \right) \sqrt{\frac{\delta^2}{4} + \|\tilde{\mathbf{w}}\|^2}} \right),$$

and thus the third-order term is order of  $\frac{d}{dx} \frac{\hat{q}'(x)}{x} (\|\tilde{\mathbf{w}}(0)\|)$ . Since we know that  $\nabla q(\tilde{\mathbf{w}}(0)) = 0$  we can write the Taylor expansion as follows

$$q(\tilde{\mathbf{w}}) = q(\tilde{\mathbf{w}}(0)) + \frac{1}{2} (\tilde{\mathbf{w}} - \tilde{\mathbf{w}}(0))^\top \nabla^2 q(\tilde{\mathbf{w}}(0)) (\tilde{\mathbf{w}} - \tilde{\mathbf{w}}(0)) + O\left(\frac{d}{dx} \frac{\hat{q}'(x)}{x} (\|\tilde{\mathbf{w}}(0)\|)\right).$$

By using Lemma H.2 and

$$\hat{q}'(x) = \sqrt{\sqrt{x^2 + \frac{\delta^2}{4}} - \frac{\delta}{2}}$$

we calculate

$$\begin{aligned} \nabla^2 q(\tilde{\mathbf{w}}(0)) &= \frac{\hat{q}'(\|\tilde{\mathbf{w}}(0)\|)}{\|\tilde{\mathbf{w}}(0)\|} \left( \mathbf{I} - \frac{\tilde{\mathbf{w}}(0)\tilde{\mathbf{w}}(0)^\top}{\left( \frac{\delta}{2} + \sqrt{\frac{\delta^2}{4} + \|\tilde{\mathbf{w}}(0)\|^2} \right) \sqrt{\delta^2 + 4\|\tilde{\mathbf{w}}(0)\|^2}} \right) \\ &= \frac{\sqrt{\sqrt{\|\tilde{\mathbf{w}}(0)\|^2 + \frac{\delta^2}{4}} - \frac{\delta}{2}}}{\|\tilde{\mathbf{w}}(0)\|} \left( \mathbf{I} - \frac{\tilde{\mathbf{w}}(0)\tilde{\mathbf{w}}(0)^\top}{2 \left( \frac{\delta}{2} + \sqrt{\frac{\delta^2}{4} + \|\tilde{\mathbf{w}}(0)\|^2} \right) \sqrt{\frac{\delta^2}{4} + \|\tilde{\mathbf{w}}(0)\|^2}} \right) \\ &= \frac{\sqrt{\sqrt{\alpha^2 + \frac{\delta^2}{4}} - \frac{\delta}{2}}}{\alpha} \left( \mathbf{I} - \frac{\alpha^2 \mathbf{u}\mathbf{u}^\top}{2 \left( \frac{\delta}{2} + \sqrt{\frac{\delta^2}{4} + \alpha^2} \right) \sqrt{\frac{\delta^2}{4} + \alpha^2}} \right) \\ &= \sqrt{\frac{1-s}{\alpha}} \sqrt{\frac{1}{1+s}} \left( \mathbf{I} - \frac{(1-s)^2}{2(1+s^2)} \mathbf{u}\mathbf{u}^\top \right). \end{aligned}$$

Also, by using

$$\hat{q}''(x) = \frac{x}{2\sqrt{x^2 + \frac{\delta^2}{4}} \sqrt{\sqrt{x^2 + \frac{\delta^2}{4}} - \frac{\delta}{2}}}$$



we have that

$$\begin{aligned}
 \frac{d}{dx} \frac{\hat{q}'(x)}{x} &= \frac{\hat{q}''(x)x - \hat{q}'(x)}{x^2} \\
 &= \frac{\frac{x^2}{2\sqrt{x^2 + \frac{\delta^2}{4}}\sqrt{\sqrt{x^2 + \frac{\delta^2}{4}} - \frac{\delta}{2}}} - \sqrt{\sqrt{x^2 + \frac{\delta^2}{4}} - \frac{\delta}{2}}}{x^2} \\
 &= \frac{1}{2\sqrt{x^2 + \frac{\delta^2}{4}}\sqrt{\sqrt{x^2 + \frac{\delta^2}{4}} - \frac{\delta}{2}}} - \frac{\sqrt{\sqrt{x^2 + \frac{\delta^2}{4}} - \frac{\delta}{2}}}{x^2},
 \end{aligned}$$

and thus, using Lemma H.2 we get

$$\begin{aligned}
 \frac{d}{dx} \frac{\hat{q}'(x)}{x} (\|\tilde{\mathbf{w}}(0)\|) &= \frac{1}{2\sqrt{\alpha^2 + \frac{\delta^2}{4}}\sqrt{\sqrt{\alpha^2 + \frac{\delta^2}{4}} - \frac{\delta}{2}}} - \frac{\sqrt{\sqrt{\alpha^2 + \frac{\delta^2}{4}} - \frac{\delta}{2}}}{\alpha^2} \\
 &= -\frac{(1-s)^{2.5}}{\alpha^{1.5}} \left( \frac{1}{2(1+s^2)\sqrt{1+s}} \right).
 \end{aligned}$$

Therefore, the Taylor expansion is

$$q(\tilde{\mathbf{w}}) = q(\tilde{\mathbf{w}}(0)) + \frac{1}{2} (\tilde{\mathbf{w}} - \tilde{\mathbf{w}}(0))^\top \left[ \sqrt{\frac{1-s}{\alpha}} \sqrt{\frac{1}{1+s}} \left( \mathbf{I} - \frac{(1-s)^2}{2(1+s^2)} \mathbf{u}\mathbf{u}^\top \right) \right] (\tilde{\mathbf{w}} - \tilde{\mathbf{w}}(0)) + O\left( \frac{(1-s)^{2.5}}{\alpha^{1.5}} \left( \frac{1}{2(1+s^2)\sqrt{1+s}} \right) \right).$$

We are interested in cases where the higher order terms vanish. Since  $0 \leq s < 1$ , we only need to require

$$\begin{aligned}
 \frac{(1-s)^{2.5}}{\alpha^{1.5}} &\ll \sqrt{\frac{1-s}{\alpha}} \\
 \Rightarrow \frac{(1-s)^2}{\alpha} &\ll 1.
 \end{aligned} \tag{27}$$

It follows that when  $\frac{(1-s)^2}{\alpha} \ll 1$  we can approximate

$$q(\tilde{\mathbf{w}}) \approx q(\tilde{\mathbf{w}}(0)) + \frac{1}{2} \sqrt{\frac{1-s}{\alpha}} \sqrt{\frac{1}{1+s}} (\tilde{\mathbf{w}} - \tilde{\mathbf{w}}(0))^\top \left( \mathbf{I} - \frac{(1-s)^2}{2(1+s^2)} \mathbf{u}\mathbf{u}^\top \right) (\tilde{\mathbf{w}} - \tilde{\mathbf{w}}(0)).$$

In this case, minimizing  $q(\tilde{\mathbf{w}})$  boils down to minimizing the squared Mahalanobis norm

$$(\tilde{\mathbf{w}} - \tilde{\mathbf{w}}(0))^\top \mathbf{B} (\tilde{\mathbf{w}} - \tilde{\mathbf{w}}(0))$$

where

$$\mathbf{B} = \mathbf{I} - \frac{(1-s)^2}{2(1+s^2)} \mathbf{u}\mathbf{u}^\top. \tag{28}$$

Note that  $\mathbf{B}^{-1}$  is related to the NTK at initialization, since it is easy to verify that

$$\mathbf{B}^{-1} = \frac{1}{a(0)^2} (a(0)^2 \mathbf{I} + \mathbf{w}(0)\mathbf{w}(0)^\top),$$

and the NTK at initialization is given by

$$K(\mathbf{x}, \mathbf{x}') = \mathbf{x}^\top (a(0)^2 \mathbf{I} + \mathbf{w}(0)\mathbf{w}(0)^\top) \mathbf{x}' = a(0)^2 (\mathbf{x}^\top \mathbf{B}^{-1} \mathbf{x}').$$

More specifically, using Lemma H.4, we can see that  $q(\tilde{\mathbf{w}})$  is the RKHS norm with respect to the NTK at initialization.

Next, we discuss the cases when condition (27) holds.

G.2.1. THE CASE  $\alpha \rightarrow \infty$  FOR ANY  $0 \leq s < 1$

In this case (27) holds and thus the implicit bias is given by

$$\tilde{\mathbf{w}}(\infty) = \arg \min_{\tilde{\mathbf{w}}} (q_\delta(\tilde{\mathbf{w}})) = \arg \min_{\tilde{\mathbf{w}}} \left( (\tilde{\mathbf{w}} - \tilde{\mathbf{w}}(0))^\top \mathbf{B} (\tilde{\mathbf{w}} - \tilde{\mathbf{w}}(0)) \right),$$

where  $\mathbf{B}$  defined in (28).

G.2.2. THE CASE  $s \rightarrow 1$  FOR ANY  $\alpha > 0$

In this case (27) also holds and thus the implicit bias is given by

$$\tilde{\mathbf{w}}(\infty) = \arg \min_{\tilde{\mathbf{w}}} (q_\delta(\tilde{\mathbf{w}})) = \arg \min_{\tilde{\mathbf{w}}} \left( (\tilde{\mathbf{w}} - \tilde{\mathbf{w}}(0))^\top \mathbf{B} (\tilde{\mathbf{w}} - \tilde{\mathbf{w}}(0)) \right),$$

where  $\mathbf{B}$  defined in (28). Since  $s \rightarrow 1$  we get that  $\mathbf{B} \rightarrow \mathbf{I}$  and thus

$$\tilde{\mathbf{w}}(\infty) = \arg \min_{\tilde{\mathbf{w}}} (\|\tilde{\mathbf{w}} - \tilde{\mathbf{w}}(0)\|).$$

## H. Auxiliary Lemmas

**Lemma H.1.**  $\delta = a^2(0) - \|\mathbf{w}(0)\|^2 = \frac{4\alpha s}{1-s^2}$ .

*Proof.* By the notation

$$\begin{aligned} \alpha &= |a(0)| \cdot \|\mathbf{w}(0)\| \\ s &= \frac{|a(0)| - \|\mathbf{w}(0)\|}{|a(0)| + \|\mathbf{w}(0)\|} \end{aligned}$$

we get

$$1 - s^2 = \frac{4|a(0)|\|\mathbf{w}(0)\|}{(|a(0)| + \|\mathbf{w}(0)\|)^2}$$

and

$$\begin{aligned} \frac{4\alpha s}{1-s^2} &= 4\alpha \frac{|a(0)| - \|\mathbf{w}(0)\|}{|a(0)| + \|\mathbf{w}(0)\|} \frac{(|a(0)| + \|\mathbf{w}(0)\|)^2}{4\alpha} \\ &= a^2(0) - \|\mathbf{w}(0)\|^2 = \delta. \end{aligned}$$

□

**Lemma H.2.** *The initialization scale  $\alpha$ , initialization shape  $s$  and the balancedness factor  $\delta$  satisfy:*

1.

$$\sqrt{\alpha^2 + \frac{\delta^2}{4}} = \frac{\alpha(1+s^2)}{1-s^2}$$

2.

$$\sqrt{\alpha^2 + \frac{\delta^2}{4}} - \frac{\delta}{2} = \alpha \frac{1-s}{1+s}$$

3.

$$\sqrt{\alpha^2 + \frac{\delta^2}{4}} + \frac{\delta}{2} = \alpha \frac{1+s}{1-s}$$

*Proof.* 1. Using Lemma H.1 we get

$$\sqrt{\alpha^2 + \frac{\delta^2}{4}} = \sqrt{\alpha^2 + \frac{4\alpha^2 s^2}{(1-s^2)^2}} = \frac{\alpha}{1-s^2} \sqrt{(1-s^2)^2 + 4s^2} = \frac{\alpha(1+s^2)}{1-s^2}.$$

2. Using part 1 and Lemma H.1 we get

$$\sqrt{\alpha^2 + \frac{\delta^2}{4}} - \frac{\delta}{2} = \frac{\alpha(1+s^2)}{1-s^2} - \frac{2\alpha s}{1-s^2} = \alpha \frac{(1-s)^2}{1-s^2} = \alpha \frac{1-s}{1+s}.$$

3. Using part 1 and Lemma H.1 we get

$$\sqrt{\alpha^2 + \frac{\delta^2}{4}} + \frac{\delta}{2} = \frac{\alpha(1+s^2)}{1-s^2} + \frac{2\alpha s}{1-s^2} = \alpha \frac{(1+s)^2}{1-s^2} = \alpha \frac{1+s}{1-s}.$$

□

**Lemma H.3.** *Let*

$$\hat{g}(x) = \frac{\sqrt{\sqrt{x^2 + \frac{\delta^2}{4}} - \frac{\delta}{2}}}{x} \left( \frac{\delta}{2} + \sqrt{\frac{\delta^2}{4} + x^2} \right)$$

be defined  $\forall x > 0$ , and  $\forall \delta \geq 0$ . Then:

$$\lim_{x \rightarrow 0^+} \hat{g}(x) = 0.$$

*Proof.*

$$\lim_{x \rightarrow 0^+} \hat{g}(x) = \lim_{x \rightarrow 0^+} \delta \frac{\sqrt{\sqrt{x^2 + \frac{\delta^2}{4}} - \frac{\delta}{2}}}{x} = \lim_{x \rightarrow 0^+} \delta \sqrt{\frac{\sqrt{x^2 + \frac{\delta^2}{4}} - \frac{\delta}{2}}{x^2}}.$$

Using L'Hopital's rule we have

$$\lim_{x \rightarrow 0^+} \frac{\sqrt{x^2 + \frac{\delta^2}{4}} - \frac{\delta}{2}}{x^2} = \lim_{x \rightarrow 0^+} \frac{\frac{x}{\sqrt{x^2 + \frac{\delta^2}{4}}}}{2x} = \lim_{x \rightarrow 0^+} \frac{1}{2\sqrt{x^2 + \frac{\delta^2}{4}}} = \frac{1}{\delta},$$

and so

$$\lim_{x \rightarrow 0^+} \hat{g}(x) = \lim_{x \rightarrow 0^+} \delta \sqrt{\frac{1}{\delta}} = \sqrt{\delta}.$$

□

**Lemma H.4.** *Let  $\mathbf{A}$  be a positive definite matrix and  $f(\mathbf{x})$  a kernel predictor corresponding to a linear kernel  $K(\mathbf{x}, \mathbf{x}') = \mathbf{x}^\top \mathbf{A} \mathbf{x}'$ . Then*

$$\|f\|_K^2 = \mathbf{w}^\top \mathbf{A}^{-1} \mathbf{w},$$

where  $f(\mathbf{x}) = \mathbf{w}^\top \mathbf{x}$ .

*Proof.* Write  $K(\mathbf{x}, \mathbf{x}') = \mathbf{x}^\top \mathbf{A} \mathbf{x}' = \mathbf{x}^\top \mathbf{A}^{\frac{1}{2}} \mathbf{A}^{\frac{1}{2}} \mathbf{x}'$ , then  $\phi(\mathbf{x}) = \mathbf{A}^{\frac{1}{2}} \mathbf{x}$  is the corresponding feature mapping and

$$f(\mathbf{x}) = \tilde{\mathbf{w}}^\top \phi(\mathbf{x}) = \tilde{\mathbf{w}}^\top \mathbf{A}^{\frac{1}{2}} \mathbf{x} = \mathbf{w}^\top \mathbf{x}$$

for  $\mathbf{w} = \mathbf{A}^{\frac{1}{2}} \tilde{\mathbf{w}}$ . Therefore

$$\|f\|_K^2 = \|\tilde{\mathbf{w}}\|^2 = \left\| \mathbf{A}^{-\frac{1}{2}} \mathbf{w} \right\|^2 = \mathbf{w}^\top \mathbf{A}^{-1} \mathbf{w}.$$

□
